# Supplementary material for: The next step in learning from sentinel events in healthcare
Source: PubMed Central journal article supplement — BMJ Open Qual. 2020 Feb 24;9(1):e000739. doi: 10.1136/bmjoq-2019-000739 (PMC7047476; doi:10.1136/bmjoq-2019-000739), 2020-02-24
Supplement: bmjoq-2019-000739supp001.pdf [file bmjoq-2019-000739supp001.pdf]

**Supplementary file 1. Survey questions**

---

1. What method is used to analyse the sentinel events in your hospital?

Answer:

---

2. Which disciplines are, and what expertise is, represented within the analysis of sentinel events?

Answer:

---

3. How is dealt with the recommendations made by the investigation team? Is a selection of these recommendations implemented or are all recommendations implemented?

Answer:

---

4. When a selection of recommendations is being implemented and they need to be prioritized, based on what are they prioritized?

Answer:

---

5. Who is responsible for prioritizing the recommendations? Someone from the investigation team, the head of the concerning department or someone else?

Answer:

---

6. How is the implementation of recommendations monitored in your hospital?

Answer:

---

7. How is determined whether a recommendation is suitable and useful for other parts of the hospital?

Answer:

---

8. How are these recommendations handled?

Answer:

---

9. Are sentinel events, despite the efforts being made, reoccurring? What could be the cause?

Answer:

---
